# Supplementary material for: Gold nanocluster-based ratiometric fluorescent probe for biosensing of Hg2+ ions in living organisms
Source: Royal Society of Chemistry journal article supplement (doi:10.1039/d2an00369d), 2022-01-01
Supplement: d2an00369d1.pdf [file d2an00369d1.pdf]

## Supporting Information

### **Gold Nanocluster-Based Ratiometric Fluorescent Probe for Biosensing of Hg<sup>2+</sup> ions in Living Organisms**

Fanfan Yu, Hui Xiang, Shiyu He, Gan Zhao, Zheng Cao, Lina Yang\* and Honglin Liu\*

China Light Industry Key Laboratory of Meat Microbial Control and Utilization, School of Food and Biological Engineering, Hefei University of Technology, Hefei, 230009, China.

\*Corresponding author.

E-mail: liuhonglin@mail.ustc.edu.cn, yangln@mail.ustc.edu.cn

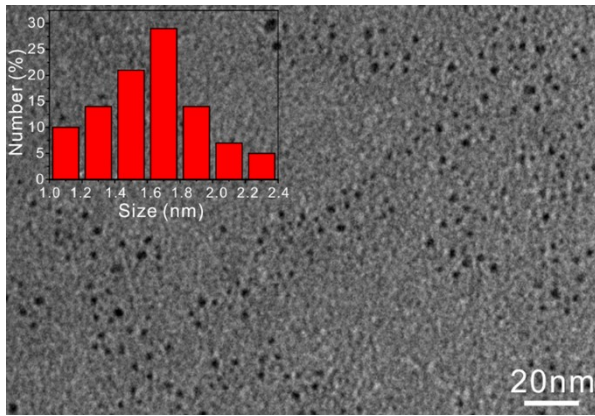

**Figure S1.** TEM image of Au-GSH NCs.

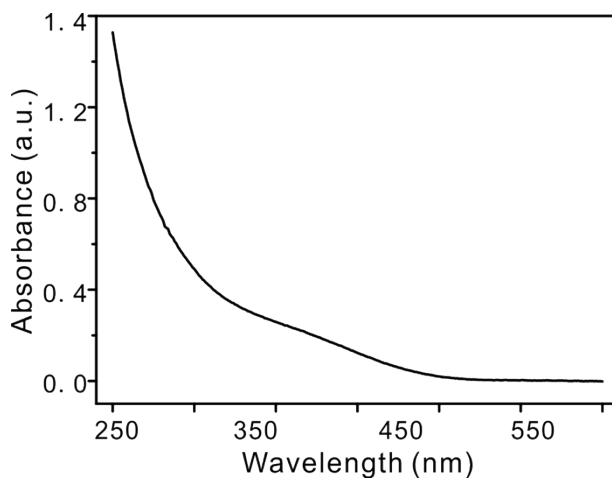

**Figure S2.** UV-vis spectrum of Au-GSH NCs.

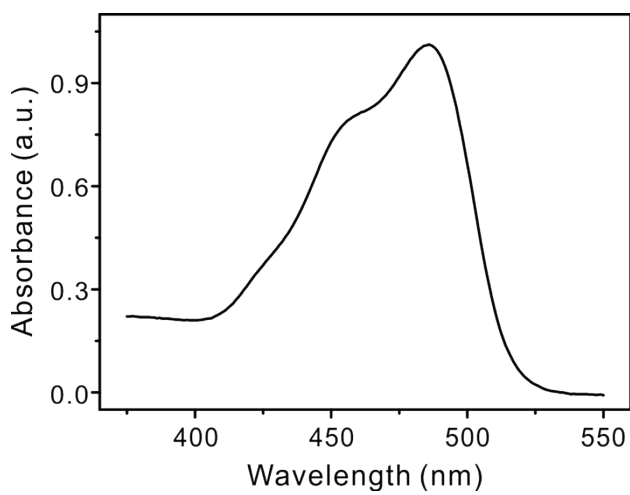

**Figure S3.** UV-vis spectrum of FITC molecule.

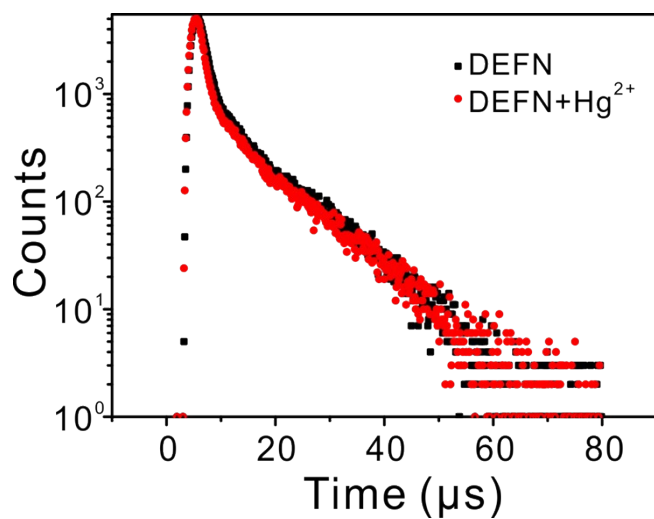

**Figure S4.** The fluorescence lifetime spectra for the emission peak of Au-GSH NCs before and after adding  $\text{Hg}^{2+}$ .

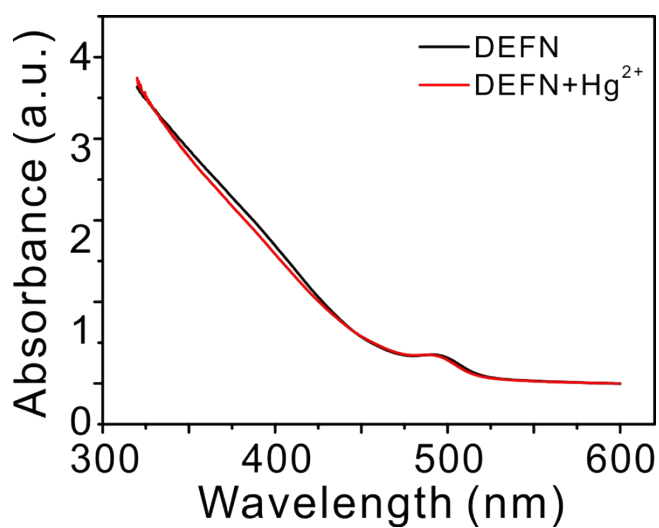

**Figure S5.** UV-vis absorption spectra of DEFN before and after adding  $\text{Hg}^{2+}$ .

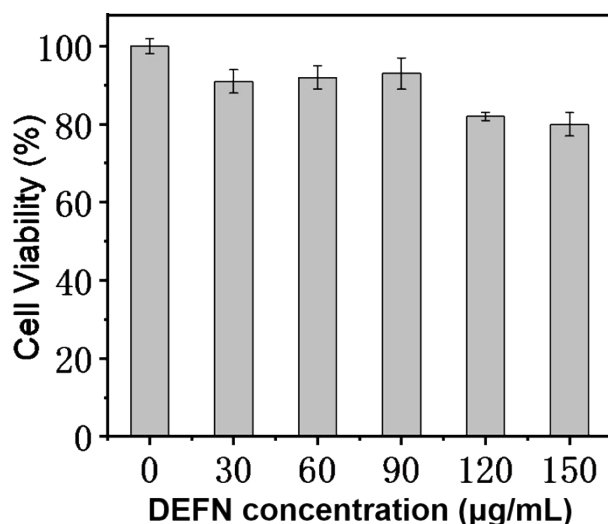

**Figure S6.** MTT assay of HeLa cells treated with different concentrations of DEFN for 24 h.

**Table S1.** Comparison of the sensitivity of different sensors for Hg<sup>2+</sup>.

| Sensing materials            | linear range | LOD/µM | references |
|------------------------------|--------------|--------|------------|
| Graphene quantum dots        | 0.6-12 µM    | 0.23   | Ref. 1     |
| Sn(II)-citrate capped Au NCs | 0.25-10 µM   | 0.05   | Ref. 2     |
| EDA capped Cu NCs            | 0.1-5.0 mM   | 33     | Ref. 3     |
| BSA capped Au NCs            | 20-260 µM    | 3.39   | Ref. 4     |
| Hoechst                      | 0-3.75 µM    | 0.87   | Ref. 5     |
| pyrazoline derivative        | 20-200 µM    | 14.54  | Ref. 6     |
| DEFN                         | 0-20 µM      | 0.5    | this work  |

## References

1. M. Liu, T. Liu, Y. Li, H. Xu, B. Zheng, D. Wang, J. Du and D. Xiao, *Talanta*, 2015, **143**, 442-449.
2. S. Chen, Y. Kuang, P. Zhang, Y. Huang, A. Wen, X. Zeng, R. Feng, H. Nie, X. Jiang and Y. Long, *Sensors Actuat. B-Chem.*, 2017, **253**, 283-291.
3. M. Jiao, Y. Li, Y. Jia, L. Xu, G. Xu, Y. Guo and X. Luo, *Microchimica Acta*, 2020, **187**, 545.
4. R. Guan, L. Tao, Y. Hu, C. Zhang, Y. Wang, M. Hong and Q. Yue, *RSC Adv.*, 2020, **10**, 33299-33306.
5. B. Paramanik, D. Bain and A. Patra, *J. Phy. Chem. C*, 2016, **120**, 17127-17135.
6. E. Bozkurt and H. I. Gul, *Sensors Actuat. B-Chem.*, 2018, **255**, 814-825.
